# Supplementary material for: LXRα Regulates oxLDL-Induced Trained Immunity in Macrophages
Source: MDPI journal article supplement (doi:10.3390/ijms23116166), 2022-05-31
Supplement: s1 [file s1]

# LXR $\alpha$ Regulates oxLDL-Induced Trained Immunity in Macrophages

Hannes M. Findeisen <sup>1\*</sup>, Vivienne C. Voges <sup>#1</sup>, Laura C. Braun <sup>1</sup>, Jannik Sonnenberg <sup>1</sup>, Dennis Schwarz <sup>1</sup>, Helena Körner <sup>1</sup>, Holger Reinecke <sup>1</sup> and Yahya Sohrabi <sup>1\*</sup>

## Supplementary Figures:

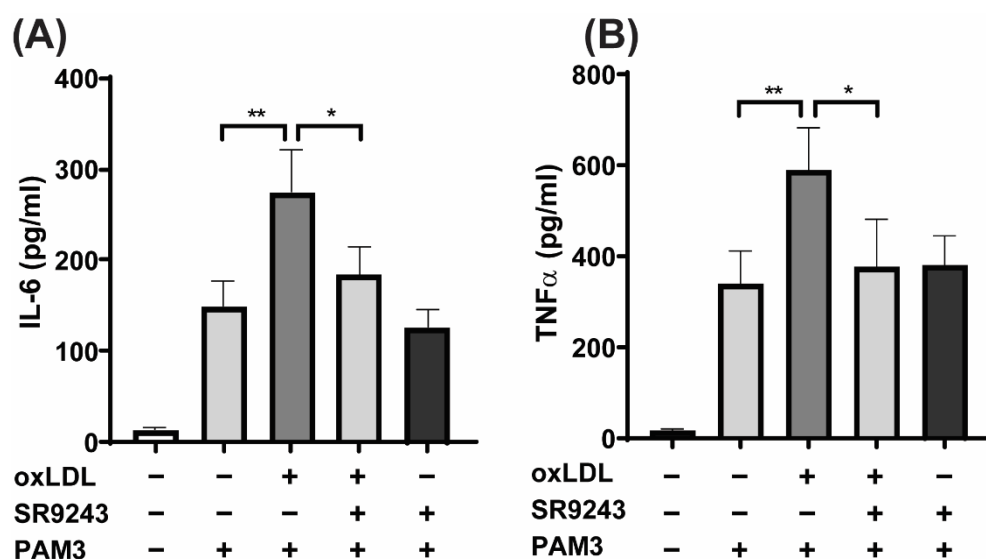

**Figure S1.** LXR inverse agonist inhibits oxLDL-induced proinflammatory immune memory in human monocytes. Monocytes were treated as indicated with 20  $\mu$ g/ml oxLDL, 1  $\mu$ M SR9238 (LXR inverse agonist) or vehicle for 24 h, kept for 5 days in complete medium and restimulated with 5  $\mu$ g/ml Pam3cys for 24 h. IL-6 (A) and TNF $\alpha$  (B) were measured in the supernatant using ELISA. Graphs represent mean values  $\pm$  SD of six individuals in three different experiments. \* $P$  < 0.05, \*\* $P$  < 0.01.

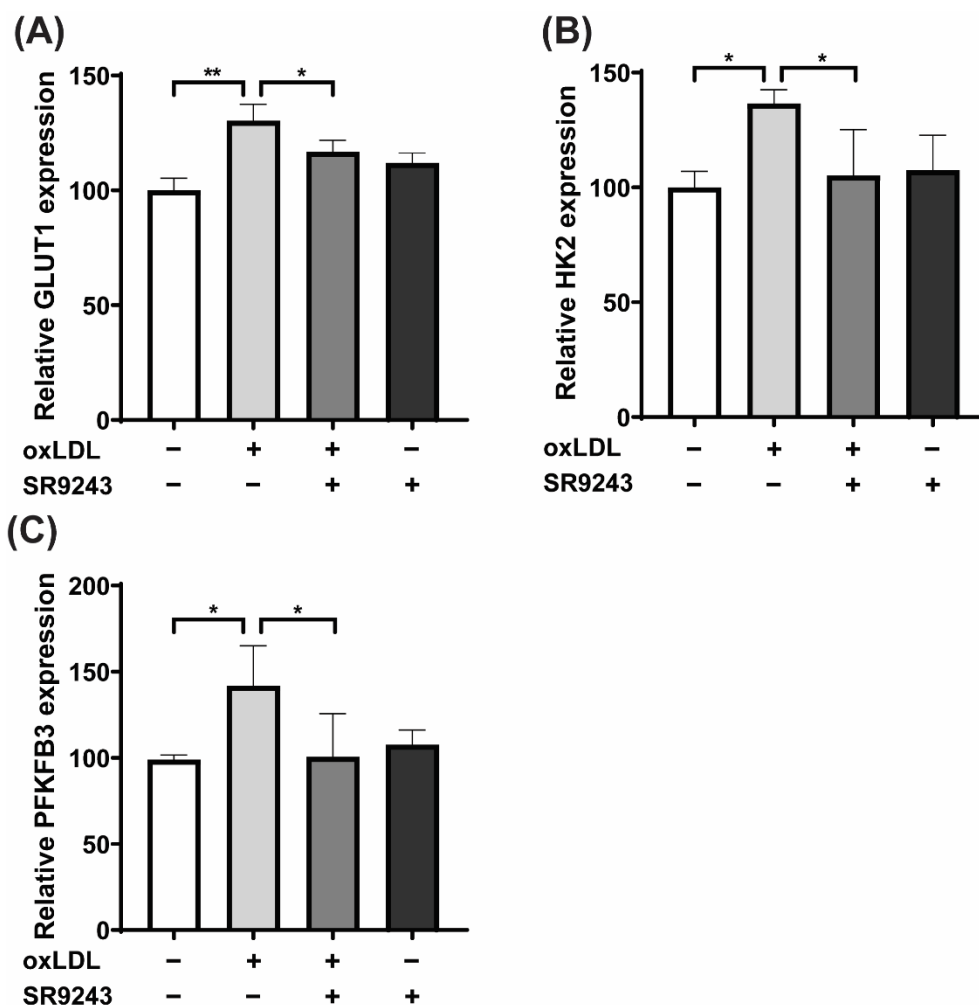

**Figure S2.** LXR inhibition alters oxLDL-induced metabolic reprogramming in trained monocytes. Monocytes were treated as indicated with 20  $\mu\text{g/ml}$  oxLDL, 1  $\mu\text{M}$  SR9238 (LXR inverse agonist) or vehicle for 24 h and lysed for RNA expression. mRNA levels of *GLUT1*, *HK2* and *PFKFB3* were analyzed by real-time qPCR (A–C). Graphs represent mean values  $\pm$  SD of six individuals in three different experiments. \* $P < 0.05$  and \*\* $P < 0.01$ .

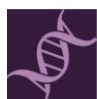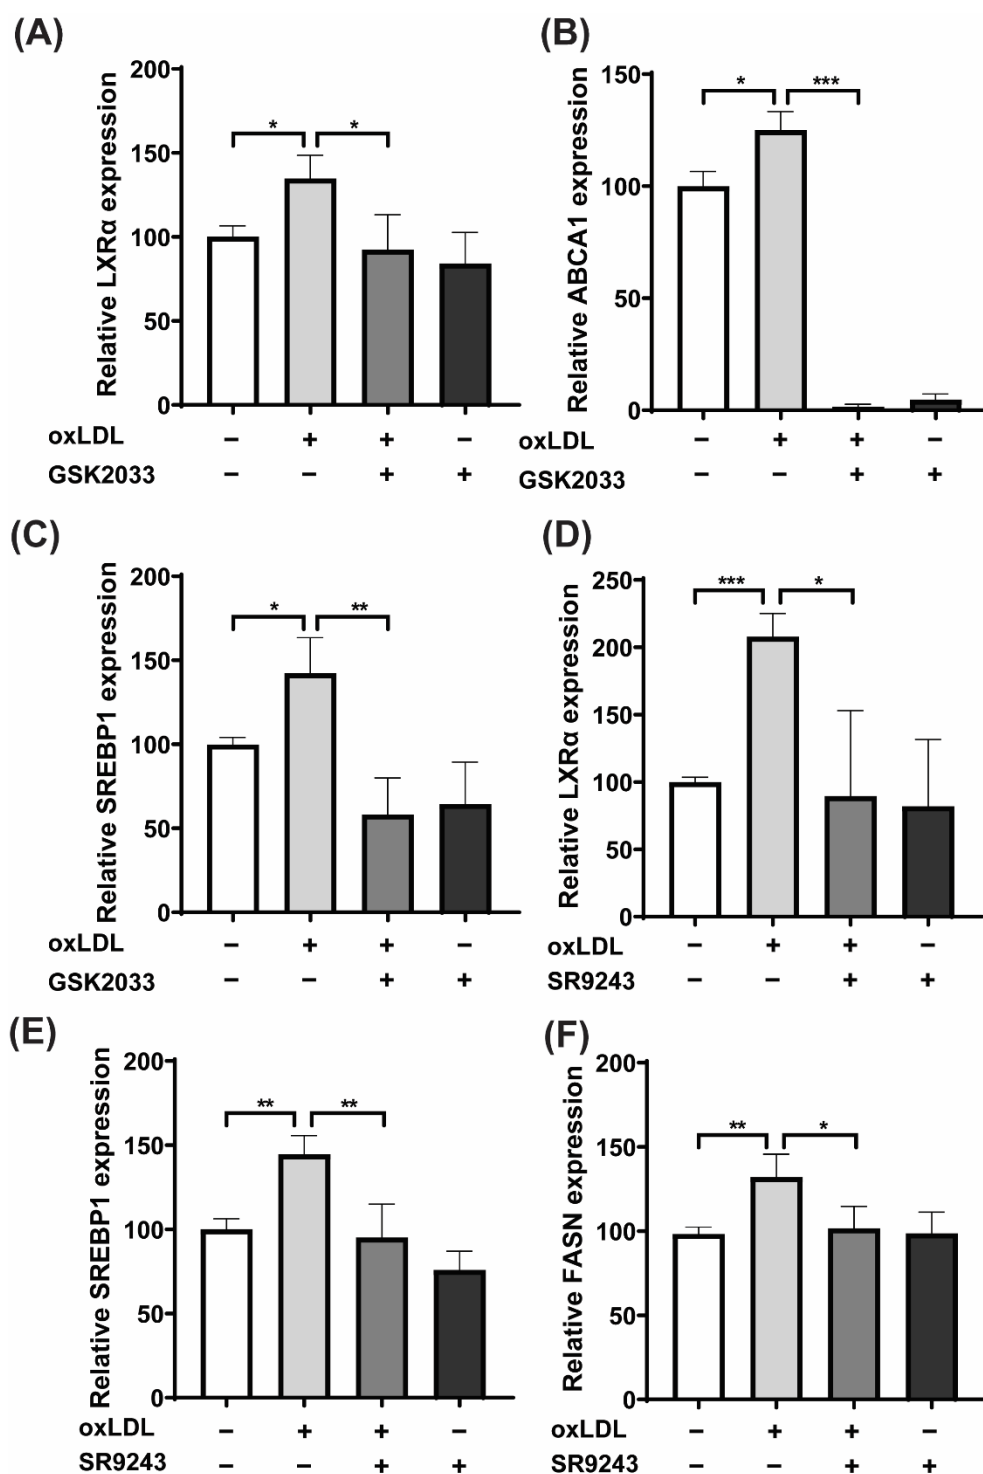

**Figure S3.** LXR inhibition reduces oxLDL-induced upregulation of LXR target genes. A–C: THP1 cells were treated with 20 µg/ml oxLDL, 2.5 µM GSK2033 (LXR antagonist) or vehicle for 24h and lysed for mRNA expression. mRNA expression of *LXRα*, *ABCA1*, *SREBP1* was measured using qPCR. D–F: Human monocytes were treated with 20µg/ml oxLDL, 1 µM SR9238 (LXR inverse agonist) or vehicle for 24 h and lysed for gene expression analysis. Expression of *LXRα*, *SREBP1* and *FASN* genes were analyzed by qPCR. Graphs represent mean values ± SD of six individuals in three different experiments. \* $P < 0.05$ , \*\* $P < 0.01$ , and \*\*\* $P < 0.001$ .

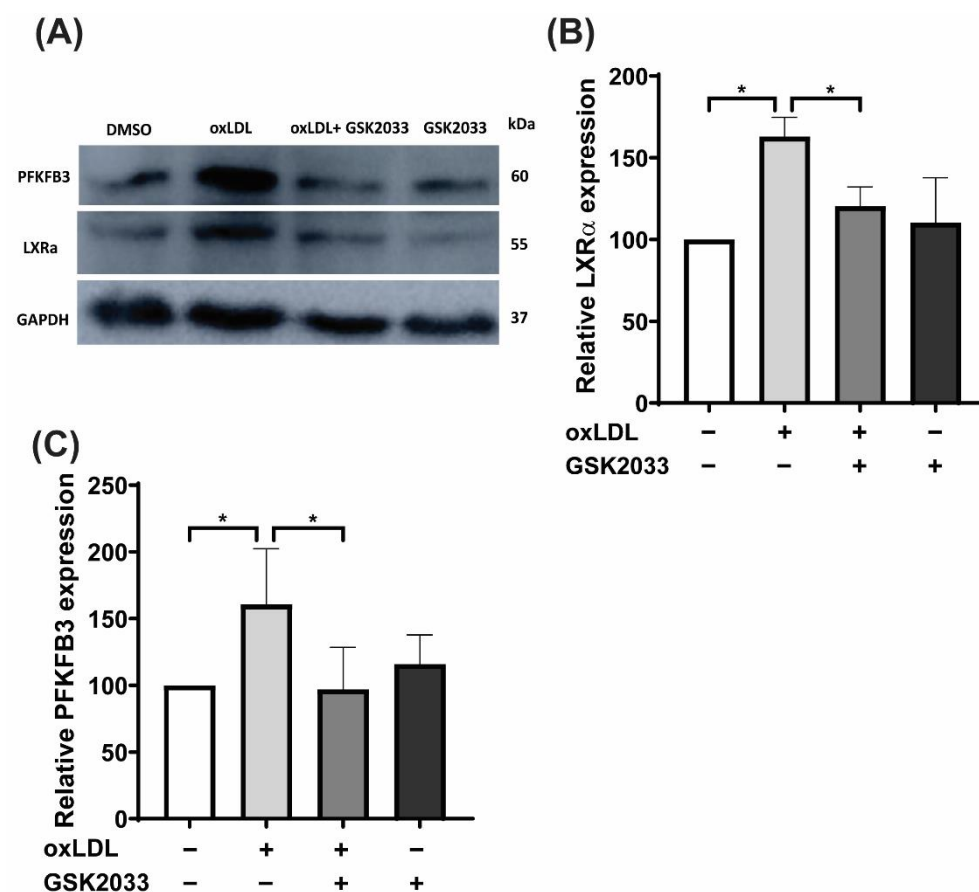

**Figure S4.** LXR antagonist inhibits oxLDL-induced upregulation of LXR $\alpha$  and PFKFB3 protein concentration in trained THP1 cells. Differentiated THP1 cells were treated with 20  $\mu$ g/ml oxLDL, 2.5  $\mu$ M GSK2033 (LXR antagonist) or vehicle for 24h. The cells were rested for 4 days and whole-cell extracts were subjected to western blot analysis for LXR $\alpha$  and PFKFB3 protein analysis. (A–C). Graphs represent mean values  $\pm$  SD of six individuals in three different experiments. \* $P < 0.05$ .

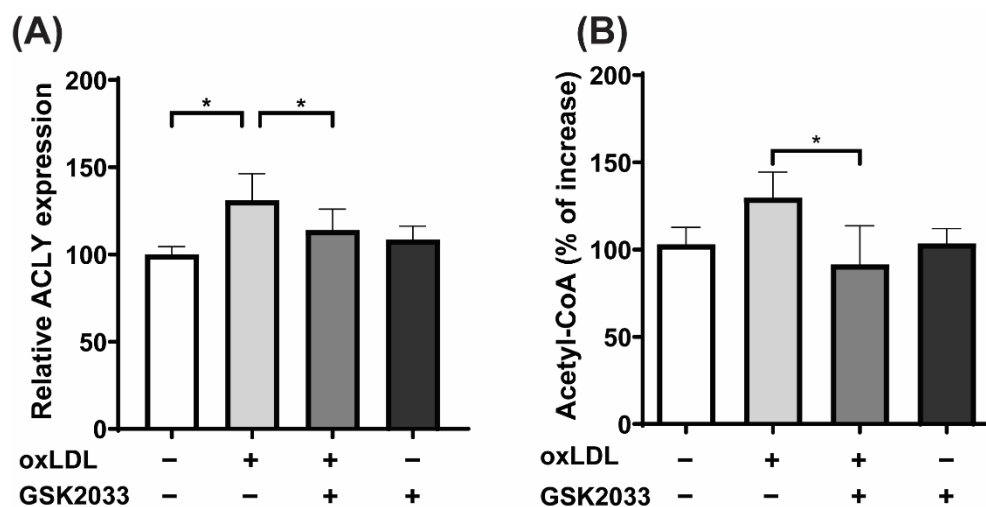

**Figure S5.** LXR inhibition alters oxLDL-induced Acetyl-CoA production. Monocytes were treated as indicated with 20  $\mu$ g/ml oxLDL, 2.5  $\mu$ M GSK2033 (LXR antagonist) or vehicle for 24 h and either lysed for RNA expression or rested for 3 days in complete medium. mRNA level of *ACLY* gene was analyzed by real-time qPCR (A). Cells were lysed and Acetyl-CoA concentration was measured on day 3 (B). Graphs represent mean values  $\pm$  SD of six individuals in three different experiments. \* $P < 0.05$ .

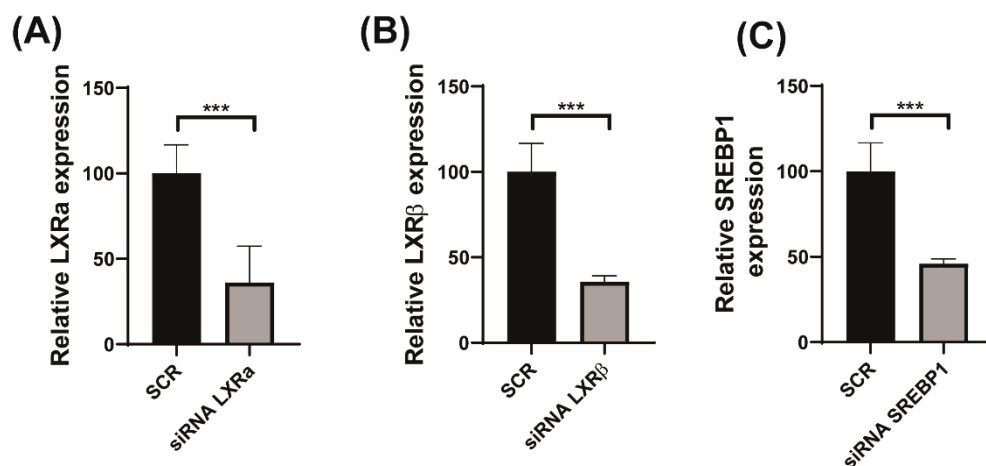

**Figure S6.** siRNA transfection efficiency. Differentiated THP1 cells were transfected with siRNA against *LXR $\alpha$* , *LXR $\beta$*  and *SREBP1* or scrambled siRNA for 24h and lysed to check transfection efficiency. mRNA expression of *LXR $\alpha$* , *LXR $\beta$*  and *SREBP1* was measured using qPCR (A–C). Graphs represent mean values  $\pm$  SD of six individuals in three different experiments. \*\*\* $P < 0.001$ .
